# Supplementary material for: Quantifying the CVD-grown two-dimensional materials via image clustering
Source: Royal Society of Chemistry journal article supplement (doi:10.1039/d1nr03802h), 2021-01-01
Supplement: d1nr03802h1.pdf [file d1nr03802h1.pdf]

## Electronic Supplementary Information

### Quantifying the CVD-Grown Two-Dimensional Materials via Image Clustering

Zebin Li<sup>1,§</sup>, Jihea Lee<sup>2,§</sup>, Fei Yao<sup>2,\*</sup>, Hongyue Sun<sup>1,\*</sup>

<sup>1</sup>Department of Industrial and Systems Engineering, University at Buffalo, The State University of New York, Buffalo, NY, USA.

<sup>2</sup>Department of Material Design and Innovation, University at Buffalo, The State University of New York, Buffalo, NY, USA.

§These authors contributed equally

\*Corresponding author: [feiyao@buffalo.edu](mailto:feiyao@buffalo.edu); [hongyues@buffalo.edu](mailto:hongyues@buffalo.edu)

The detailed explanations or definitions of extracted features are shown below:

- *Solidity* is the measurement of the convex-concave degree of the shape, and it is calculated as the area of the flake over the convex area. In our case, if the solidity of the shape is close to 1, then the shape is close to a triangle.
- *Circularity* is the measurement of the roundness of the shape. It is calculated as  $\frac{4 \times Area \times \pi}{Perimeter^2}$ , and if the shape is close to a perfect circle, the value is close to 1.
- *Eccentricity* is the measurement of how close a conic section being a circular. In our case, it is calculated as the eccentricity of the ellipse that has the same second-moment of the shape. If the value is larger, then the shape is more narrow and close to a line segment.
- *Ratio of the equivdiameter over the perimeter*. The Euivdiameter of a shape is defined as the diameter of a circle that has the same area as the shape. The ratio of the equivdiameter over

the perimeter is a constant of 0.248 for an equilateral triangle. The difference from this constant can be used to measure the triangularity.

- *Ratio of the major axis length over the minor axis length.* The length of the major/minor axis of a shape is the length of the major/minor axis of the ellipse that has the same normalized second central moment as the shape, and it can be used as a measurement of the irregularity of MoS<sub>2</sub> flakes.
- *The number of MoS<sub>2</sub> flakes in each image.* This is a basic description of the optical images.
- *The number of light-spots.* Light-spots are the parts within MoS<sub>2</sub> flakes that have high brightness. They are multilayer MoS<sub>2</sub> formed during the growth and need to be avoided for monolayer samples.
- *Ratio of the number of light-spots over the number of MoS<sub>2</sub> flakes.* This is a feature derived from the above two features and can be used to measure the percentage of the multilayer flakes over monolayer ones.
- *Entropy of each image,* which is a statistical measurement of the randomness of images and is used to measure the image texture.
- *Perimeter of each MoS<sub>2</sub> flake.* This is a basic description of the MoS<sub>2</sub> flakes.

**Table S1.** CVD Synthesis Parameters

| Images                | Temperature (°C) | Dwell (min) | Flow rate (sccm) |
|-----------------------|------------------|-------------|------------------|
| Fig 5b – top left     | 740              | 40          | 100              |
| Fig 5b – top right    | 760              | 50          | 100              |
| Fig 5b – bottom left  | 780              | 10          | 100              |
| Fig 5b – bottom right | 780              | 20          | 100              |
| Fig 5c – top left     | 800              | 40          | 100              |
| Fig 5c – top right    | 780              | 20          | 100              |
| Fig 5c – bottom left  | 780              | 40          | 100              |

|                       |     |    |     |
|-----------------------|-----|----|-----|
| Fig 5c – bottom right | 780 | 40 | 150 |
| Fig 6a – top left     | 760 | 40 | 100 |
| Fig 6a – top right    | 780 | 40 | 200 |
| Fig 6a – bottom left  | 760 | 40 | 100 |
| Fig 6a – bottom right | 740 | 40 | 100 |
| Fig 6b                | 780 | 10 | 100 |
| Fig 7b – top left     | 800 | 40 | 100 |
| Fig 7b – top right    | 780 | 40 | 200 |
| Fig 7b – bottom left  | 780 | 20 | 100 |
| Fig 7b – bottom right | 780 | 20 | 100 |
| Fig 7c                | 780 | 40 | 100 |

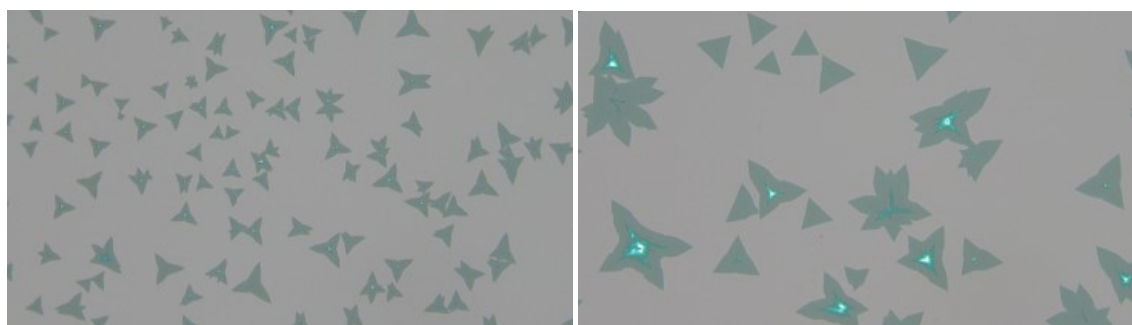

**Fig. S1.** The examples of optical images that are even hard for material experts to label.
